# Supplementary material for: ATR inhibition induces synthetic lethality in mismatch repair-deficient cells and augments immunotherapy
Source: PubMed Central journal article supplement — Genes Dev. 2023 Oct 1;37(19-20):929–43. doi: 10.1101/gad.351084.123 (PMC10691477; doi:10.1101/gad.351084.123), 2023-10-01
Supplement: Supplemental_Table.pdf [file Supplemental_Table.pdf]

## Supplemental Table S1

**Top 100 genes whose sgRNAs are preferentially depleted in *Mhl1* KO cells compared to parental CT26 cells**

| id       | num | neg.score | neg.p.value | neg.fdr  | neg.rank | neg.goodsgrna | neg.lfc  |
|----------|-----|-----------|-------------|----------|----------|---------------|----------|
| Rps6kl1  | 4   | 1.14E-05  | 0.00010322  | 0.694059 | 1        | 4             | -1.0285  |
| Il2rb    | 4   | 2.29E-05  | 0.0001583   | 0.694059 | 2        | 4             | -1.0695  |
| Padi4    | 4   | 2.51E-05  | 0.00016118  | 0.694059 | 3        | 3             | -0.68368 |
| Spem1    | 4   | 2.88E-05  | 0.00016501  | 0.694059 | 4        | 4             | -1.4387  |
| Ctu2     | 4   | 3.15E-05  | 0.00016788  | 0.694059 | 5        | 4             | -1.0582  |
| Pgf      | 4   | 4.39E-05  | 0.00022297  | 0.768152 | 6        | 3             | -1.1349  |
| G3bp1    | 4   | 5.52E-05  | 0.00035037  | 0.775283 | 7        | 4             | -0.84264 |
| Fbxw10   | 4   | 6.33E-05  | 0.0003772   | 0.775283 | 8        | 4             | -0.88716 |
| Zfat     | 4   | 7.42E-05  | 0.00046198  | 0.775283 | 9        | 4             | -0.79008 |
| Crb1     | 4   | 7.54E-05  | 0.00046198  | 0.775283 | 10       | 1             | -0.10488 |
| Clec12b  | 4   | 0.000103  | 0.00050939  | 0.775283 | 11       | 3             | -1.0449  |
| Cpb2     | 4   | 0.0001109 | 0.00063058  | 0.775283 | 12       | 3             | -0.79578 |
| Arxes2   | 4   | 0.000111  | 0.00063058  | 0.775283 | 13       | 3             | -1.2063  |
| Fam46c   | 4   | 0.0001257 | 0.00067895  | 0.775283 | 14       | 2             | 0.13857  |
| Avpr1a   | 4   | 0.0001317 | 0.00077044  | 0.775283 | 15       | 3             | -0.99324 |
| Tmem40   | 4   | 0.0001466 | 0.00078577  | 0.775283 | 16       | 3             | -1.1356  |
| Ifit1    | 4   | 0.000147  | 0.00078577  | 0.775283 | 17       | 3             | -0.961   |
| Cnga1    | 4   | 0.0001625 | 0.00087725  | 0.775283 | 18       | 4             | -0.93333 |
| Ankrd13a | 4   | 0.000165  | 0.00089545  | 0.775283 | 19       | 4             | -0.8623  |
| Sema3f   | 4   | 0.000176  | 0.0009558   | 0.775283 | 20       | 2             | -0.4208  |
| Unc93a   | 4   | 0.0001777 | 0.00097688  | 0.775283 | 21       | 2             | -0.8396  |
| Gucd1    | 4   | 0.000179  | 0.00097736  | 0.775283 | 22       | 4             | -1.09    |
| AI607873 | 4   | 0.0001841 | 0.00099412  | 0.775283 | 23       | 4             | -0.77932 |
| Slfn14   | 4   | 0.0001886 | 0.0010262   | 0.775283 | 24       | 4             | -1.3664  |
| Matn3    | 4   | 0.0001893 | 0.0010262   | 0.775283 | 25       | 2             | -0.49389 |
| Cts7     | 4   | 0.0001935 | 0.001042    | 0.775283 | 26       | 3             | -1.1741  |
| Scaper   | 4   | 0.0001938 | 0.001042    | 0.775283 | 27       | 3             | -1.1263  |
| Veph1    | 4   | 0.0001984 | 0.0010502   | 0.775283 | 28       | 3             | -1.1944  |
| Gpatch11 | 4   | 0.0002186 | 0.0011249   | 0.796865 | 29       | 4             | -0.88745 |
| Stambp11 | 4   | 0.0002262 | 0.0011565   | 0.796865 | 30       | 2             | -0.31422 |
| Frem1    | 4   | 0.0002553 | 0.0012877   | 0.856281 | 31       | 4             | -0.89307 |
| Bdh1     | 4   | 0.0002656 | 0.0013256   | 0.856281 | 32       | 4             | -0.8845  |
| Fus      | 4   | 0.0002765 | 0.0013711   | 0.858836 | 33       | 2             | 0.05288  |
| Pdlim2   | 4   | 0.0002984 | 0.0015181   | 0.871975 | 34       | 4             | -0.95548 |
| Celf1    | 4   | 0.0003045 | 0.0015186   | 0.871975 | 35       | 2             | -0.66059 |

|               |   |           |           |          |    |   |          |
|---------------|---|-----------|-----------|----------|----|---|----------|
| Adra1a        | 4 | 0.0003053 | 0.0015186 | 0.871975 | 36 | 3 | -1.1434  |
| Mast1         | 4 | 0.0003176 | 0.0015933 | 0.888353 | 37 | 4 | -0.71119 |
| Dram2         | 4 | 0.0003268 | 0.0016331 | 0.888353 | 38 | 4 | -0.90756 |
| B3gat1        | 4 | 0.0003738 | 0.0020493 | 1        | 39 | 4 | -0.80638 |
| 8030423J24Rik | 4 | 0.000392  | 0.0060225 | 1        | 40 | 2 | -0.48052 |
| Flt3          | 4 | 0.0003977 | 0.0060229 | 1        | 41 | 4 | -1.0026  |
| Ebf2          | 4 | 0.0004061 | 0.0060569 | 1        | 42 | 4 | -0.86404 |
| Lrcol1        | 4 | 0.000409  | 0.0060574 | 1        | 43 | 2 | -0.46501 |
| Olfr51        | 4 | 0.0004107 | 0.0060574 | 1        | 44 | 3 | -1.5318  |
| Heatr5a       | 4 | 0.0004273 | 0.0060718 | 1        | 45 | 3 | -0.36115 |
| Hemgn         | 4 | 0.0004277 | 0.0060718 | 1        | 46 | 2 | -0.62874 |
| Plagl2        | 4 | 0.0004776 | 0.006385  | 1        | 47 | 1 | 0.55883  |
| Terf2ip       | 4 | 0.0005234 | 0.0065508 | 1        | 48 | 4 | -1.0609  |
| Tmem221       | 4 | 0.0005243 | 0.0065512 | 1        | 49 | 4 | -0.71889 |
| Gm960         | 4 | 0.0005278 | 0.0065512 | 1        | 50 | 1 | -0.11258 |
| Ccdc173       | 4 | 0.0005352 | 0.0066039 | 1        | 51 | 4 | -0.68931 |
| Gfpt2         | 4 | 0.0005413 | 0.0066413 | 1        | 52 | 3 | -0.96154 |
| Atmin         | 4 | 0.0005621 | 0.0067222 | 1        | 53 | 4 | -0.94611 |
| Ankrd13b      | 4 | 0.0005693 | 0.00674   | 1        | 54 | 3 | -1.7668  |
| Stk36         | 4 | 0.0005715 | 0.00674   | 1        | 55 | 4 | -0.65257 |
| AI467606      | 4 | 0.0005756 | 0.0068947 | 1        | 56 | 4 | -0.6418  |
| Prph2         | 4 | 0.0005781 | 0.0068947 | 1        | 57 | 1 | 0.29135  |
| Agap1         | 4 | 0.0006283 | 0.0070705 | 1        | 58 | 1 | 0.36655  |
| Olfr1329      | 4 | 0.0006337 | 0.0070705 | 1        | 59 | 4 | -0.68078 |
| Rac2          | 4 | 0.0006343 | 0.0070705 | 1        | 60 | 4 | -0.75941 |
| Daglb         | 4 | 0.0006359 | 0.0070709 | 1        | 61 | 4 | -0.95774 |
| Lhx8          | 4 | 0.0006371 | 0.0070709 | 1        | 62 | 2 | -0.46076 |
| A530064D06Rik | 4 | 0.0006658 | 0.007195  | 1        | 63 | 4 | -0.70341 |
| Spp12b        | 4 | 0.0006786 | 0.0071955 | 1        | 64 | 3 | -0.40931 |
| Aqp11         | 4 | 0.0006814 | 0.0073492 | 1        | 65 | 4 | -0.71478 |
| Pax3          | 4 | 0.0006854 | 0.0073952 | 1        | 66 | 4 | -0.65117 |
| Lrrc3b        | 4 | 0.0007026 | 0.0073957 | 1        | 67 | 4 | -0.94274 |
| Clca2         | 4 | 0.000712  | 0.0074469 | 1        | 68 | 4 | -0.87498 |
| Olfr1474      | 4 | 0.0007257 | 0.0074857 | 1        | 69 | 4 | -0.90454 |
| Olfr350       | 4 | 0.0007289 | 0.0074857 | 1        | 70 | 3 | -0.23359 |
| Fhl2          | 4 | 0.0007389 | 0.0075044 | 1        | 71 | 2 | -0.59338 |
| Fam24a        | 4 | 0.0007601 | 0.0075466 | 1        | 72 | 4 | -1.2683  |
| Srsf11        | 4 | 0.0007706 | 0.007547  | 1        | 73 | 4 | -1.3618  |
| Rnft2         | 4 | 0.0007723 | 0.007547  | 1        | 74 | 2 | -0.64575 |
| Rnf19b        | 4 | 0.0007744 | 0.0075662 | 1        | 75 | 4 | -0.63735 |
| Mkxn3         | 4 | 0.0007791 | 0.0075662 | 1        | 76 | 3 | -0.55993 |
| Pdcd1lg2      | 4 | 0.0007934 | 0.0075667 | 1        | 77 | 3 | -1.0532  |

|          |   |           |           |   |     |   |          |
|----------|---|-----------|-----------|---|-----|---|----------|
| Id4      | 4 | 0.0007959 | 0.0075667 | 1 | 78  | 4 | -0.78235 |
| Pxmp4    | 4 | 0.000811  | 0.0075935 | 1 | 79  | 3 | -0.78165 |
| Ddx39b   | 4 | 0.0008294 | 0.0078704 | 1 | 80  | 4 | -1.4349  |
| Pbx3     | 4 | 0.0008429 | 0.0080461 | 1 | 81  | 3 | -0.82498 |
| Kdelr1   | 4 | 0.0008482 | 0.0080629 | 1 | 82  | 3 | -0.91714 |
| Tbpl1    | 4 | 0.0008706 | 0.0081419 | 1 | 83  | 4 | -0.88879 |
| Insm2    | 4 | 0.0009283 | 0.0082871 | 1 | 84  | 4 | -0.66913 |
| Vps72    | 4 | 0.0009298 | 0.0082871 | 1 | 85  | 3 | -0.4851  |
| Arntl2   | 4 | 0.0009536 | 0.0083853 | 1 | 86  | 2 | -0.73607 |
| Gm2863   | 4 | 0.0009611 | 0.008403  | 1 | 87  | 4 | -0.86361 |
| Pgbd1    | 4 | 0.0009752 | 0.0084557 | 1 | 88  | 3 | -0.86456 |
| Zfp563   | 4 | 0.0009801 | 0.0085136 | 1 | 89  | 2 | -0.23449 |
| Ap1g2    | 4 | 0.0010303 | 0.0085141 | 1 | 90  | 1 | 0.33558  |
| Kif3b    | 4 | 0.0010337 | 0.0085385 | 1 | 91  | 3 | -0.72659 |
| Nono     | 4 | 0.0010376 | 0.0085385 | 1 | 92  | 3 | -0.78975 |
| Rras     | 4 | 0.0010446 | 0.008539  | 1 | 93  | 4 | -0.77898 |
| Lasp1    | 4 | 0.0010484 | 0.008539  | 1 | 94  | 4 | -0.74507 |
| Cacna1g  | 4 | 0.0010625 | 0.0085678 | 1 | 95  | 4 | -0.76514 |
| Cdk17    | 4 | 0.0010806 | 0.0085682 | 1 | 96  | 3 | -0.41822 |
| Scyl3    | 4 | 0.001085  | 0.0086042 | 1 | 97  | 3 | -0.79913 |
| Vmn2r108 | 4 | 0.0010886 | 0.0086971 | 1 | 98  | 4 | -0.9143  |
| Nkapl    | 4 | 0.0010972 | 0.0087641 | 1 | 99  | 3 | -0.87114 |
| Homer2   | 4 | 0.0011308 | 0.0090233 | 1 | 100 | 1 | 0.19268  |

---
