# Supplementary figures and images for: ATR inhibition induces synthetic lethality in mismatch repair-deficient cells and augments immunotherapy
Source: PubMed Central journal article supplement — Genes Dev. 2023 Oct 1;37(19-20):929–43. doi: 10.1101/gad.351084.123 (PMC10691477; doi:10.1101/gad.351084.123), 2023-10-01

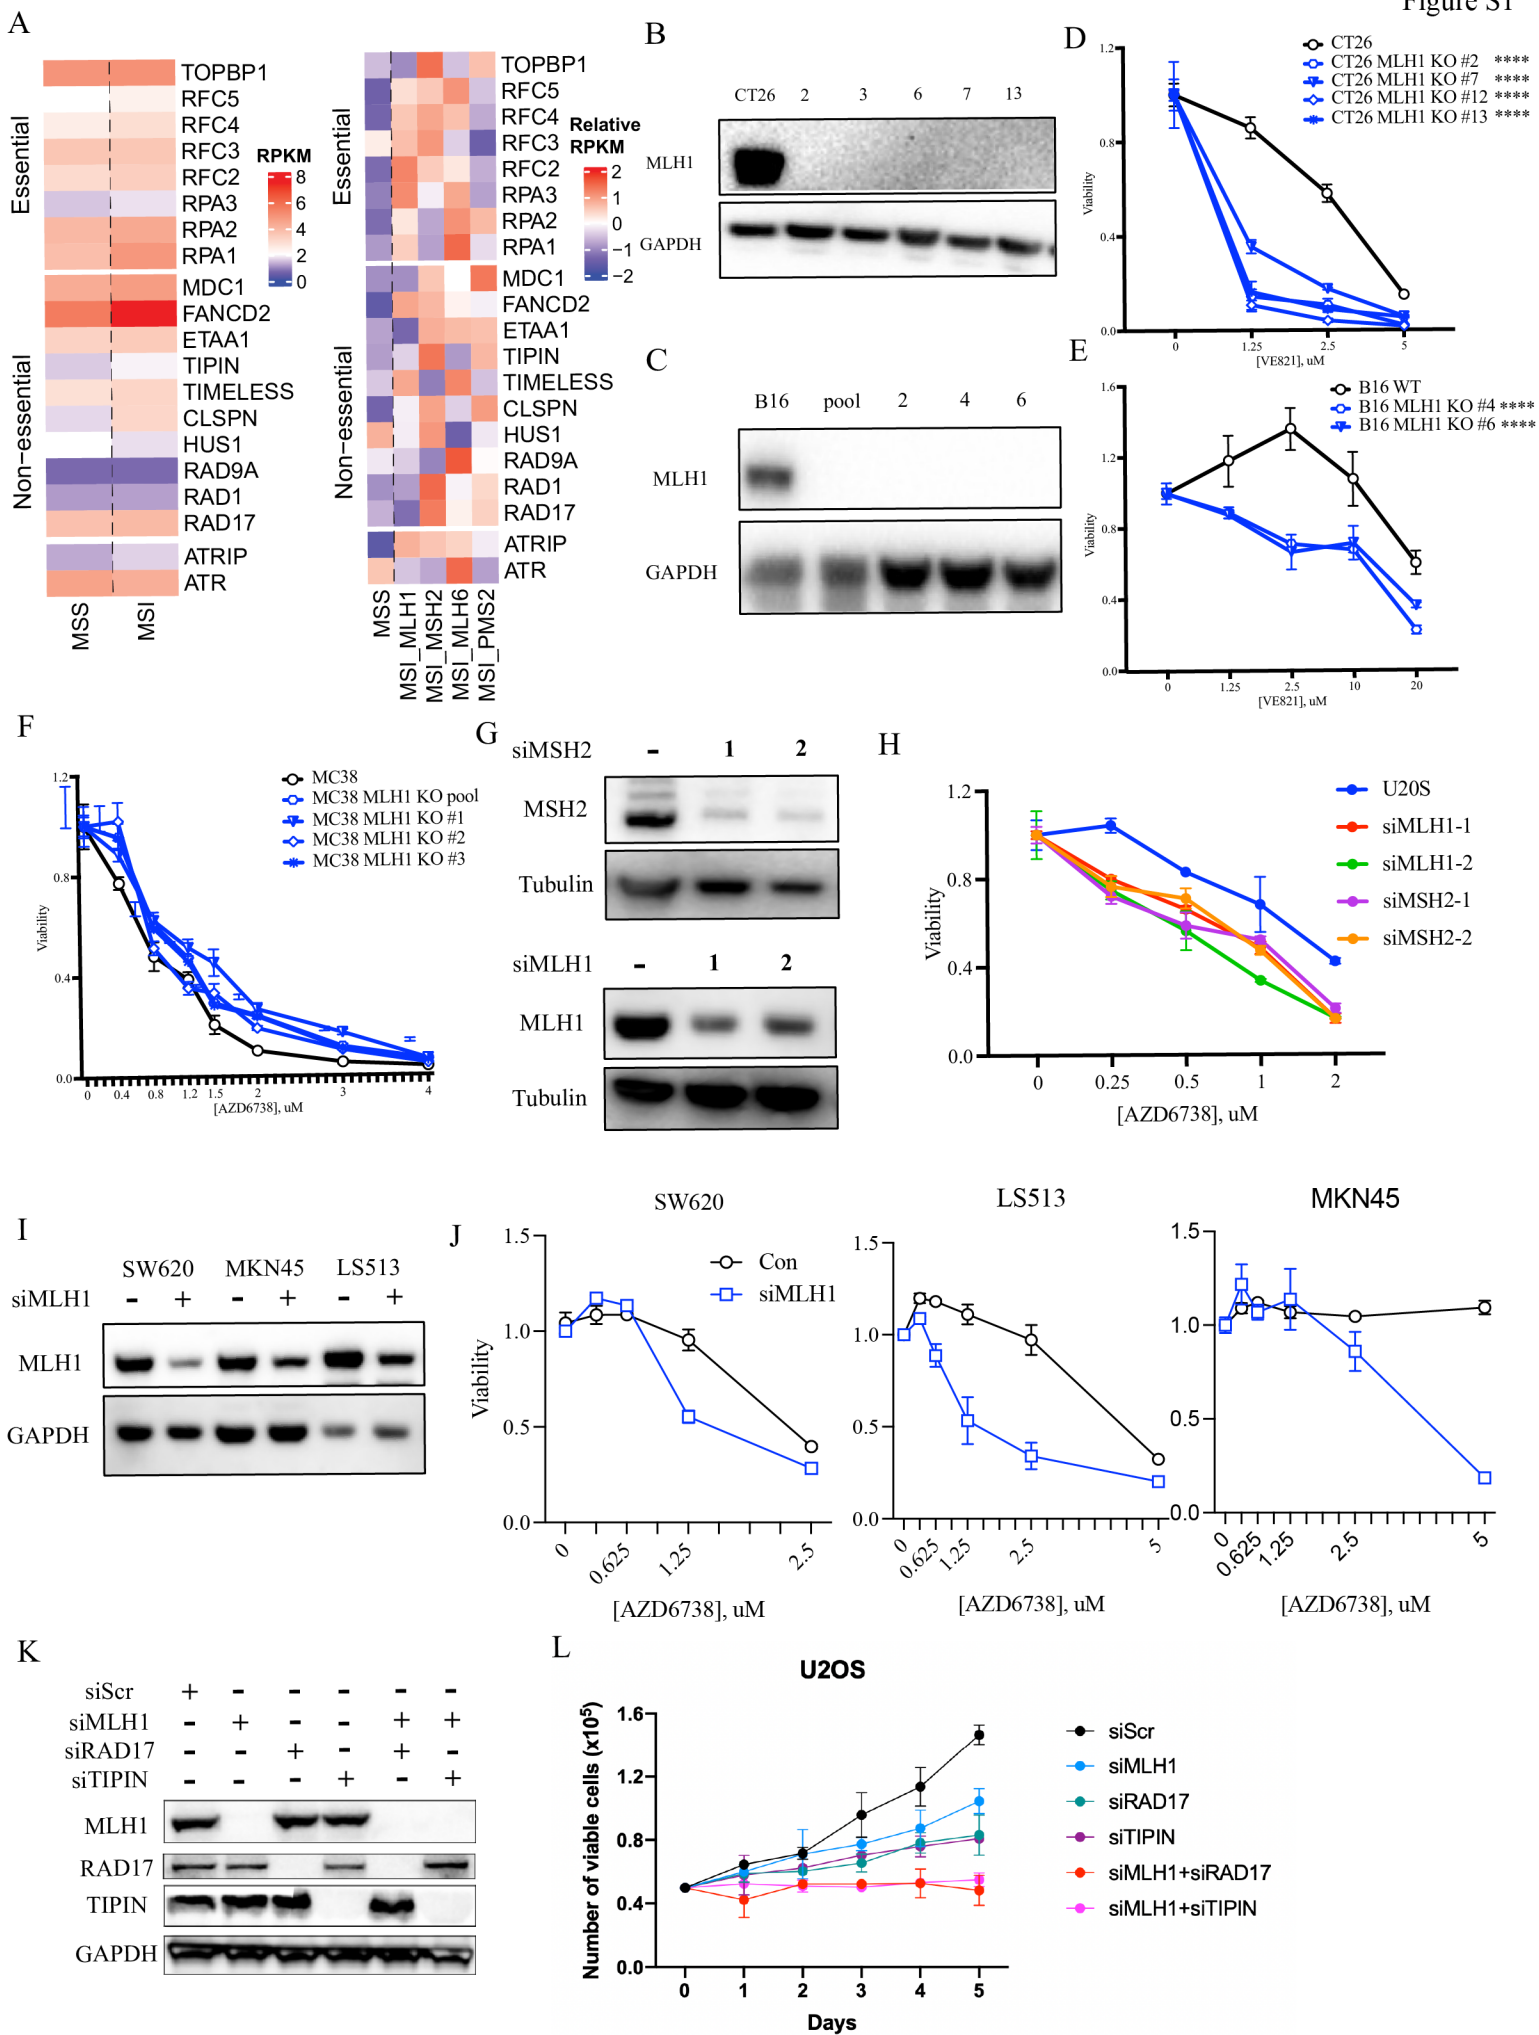

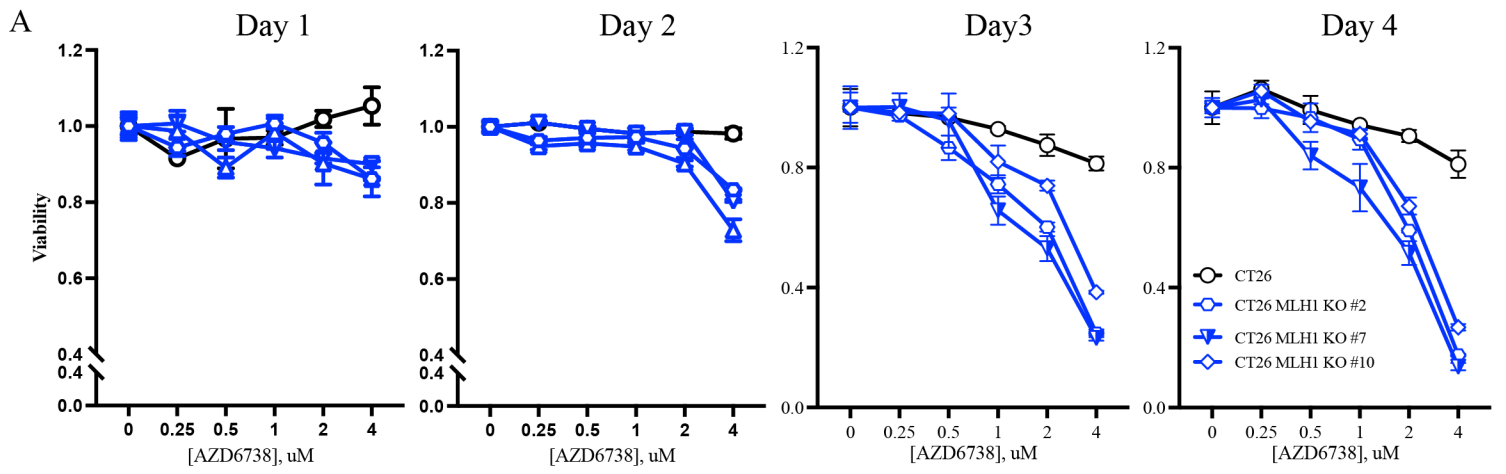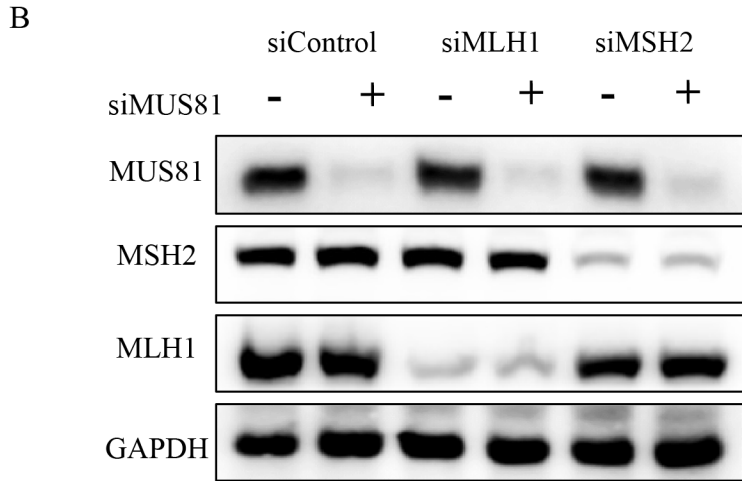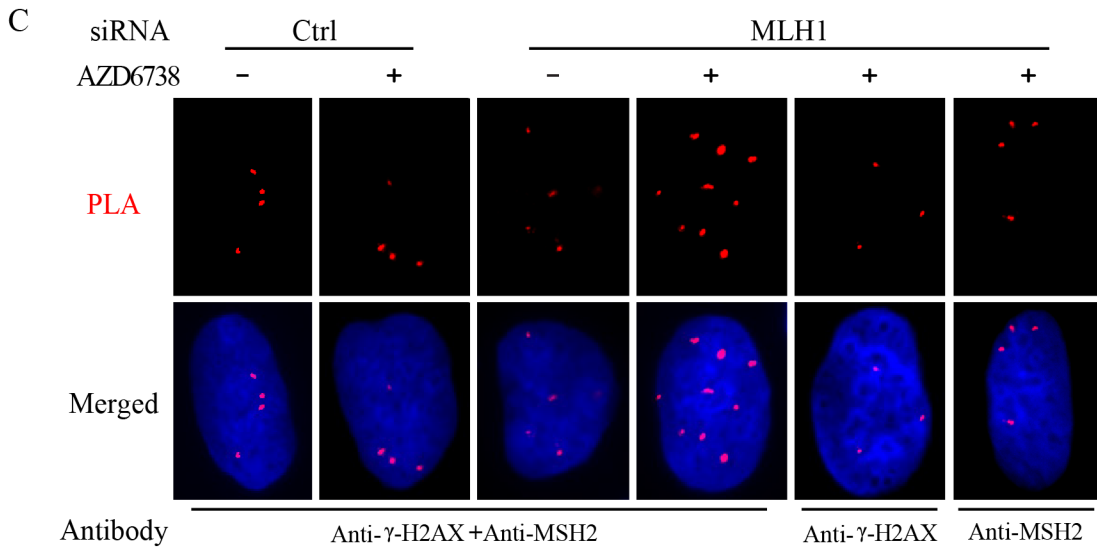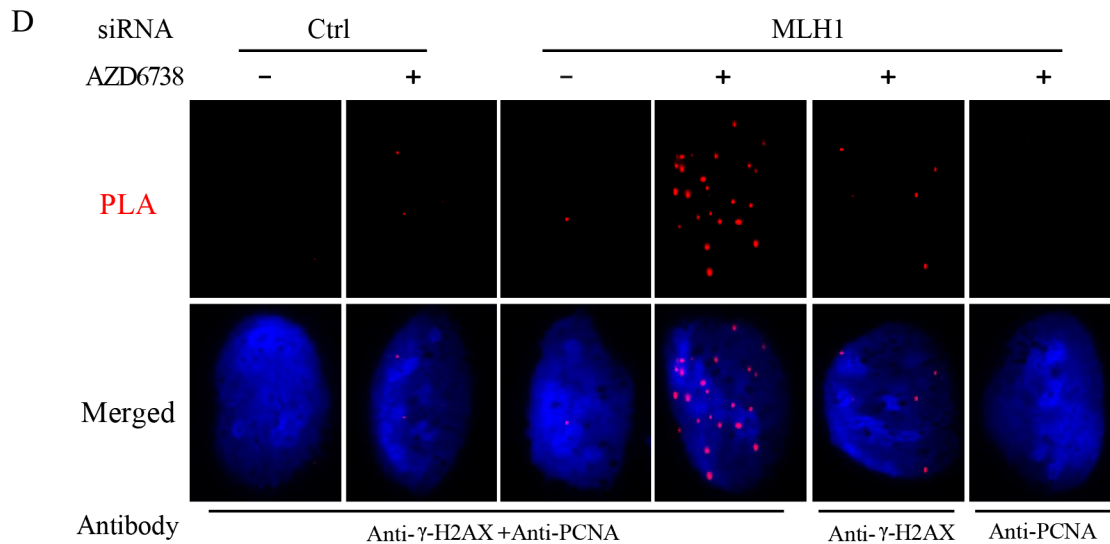

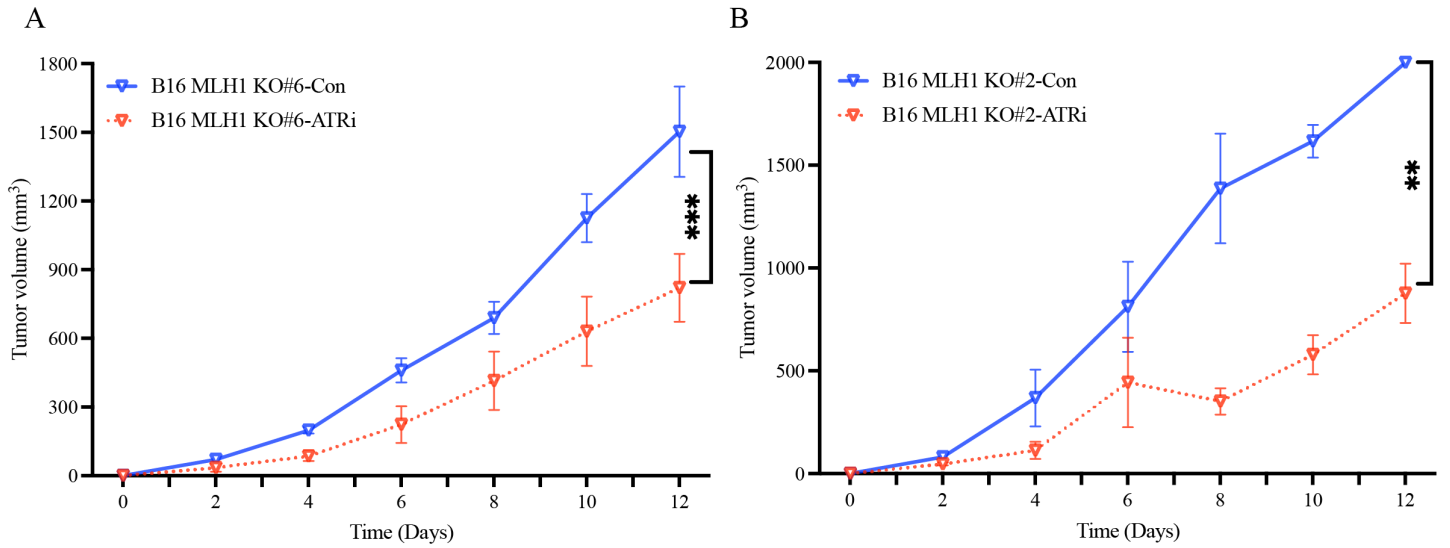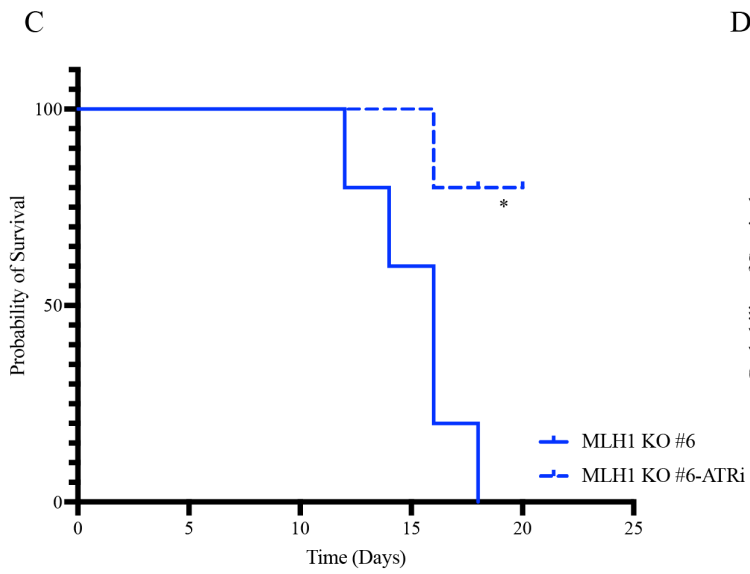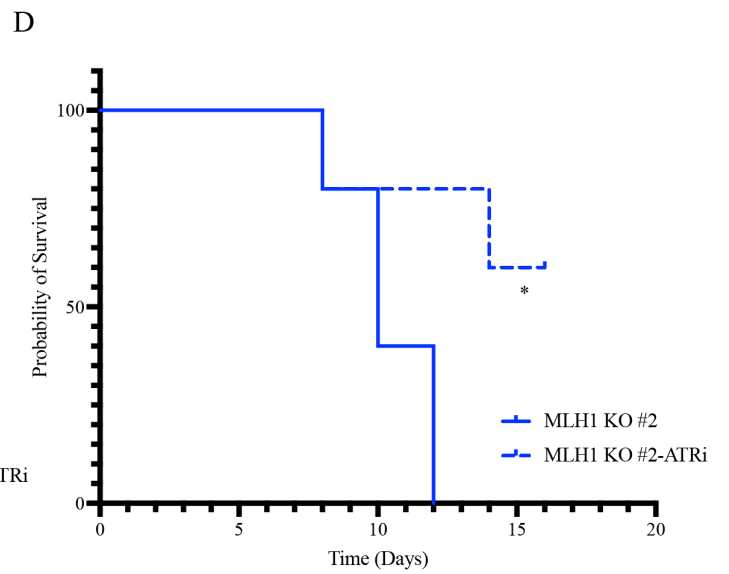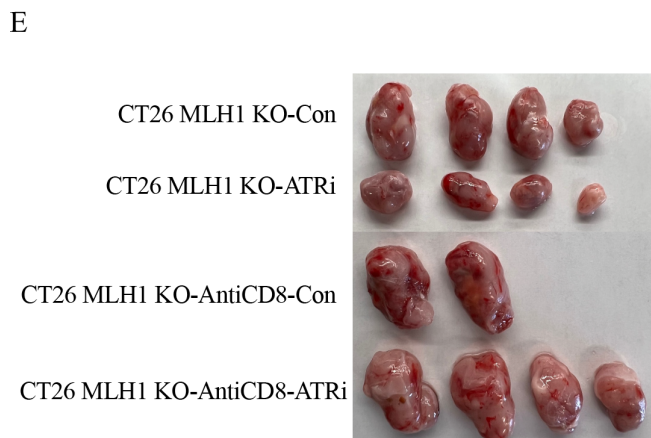

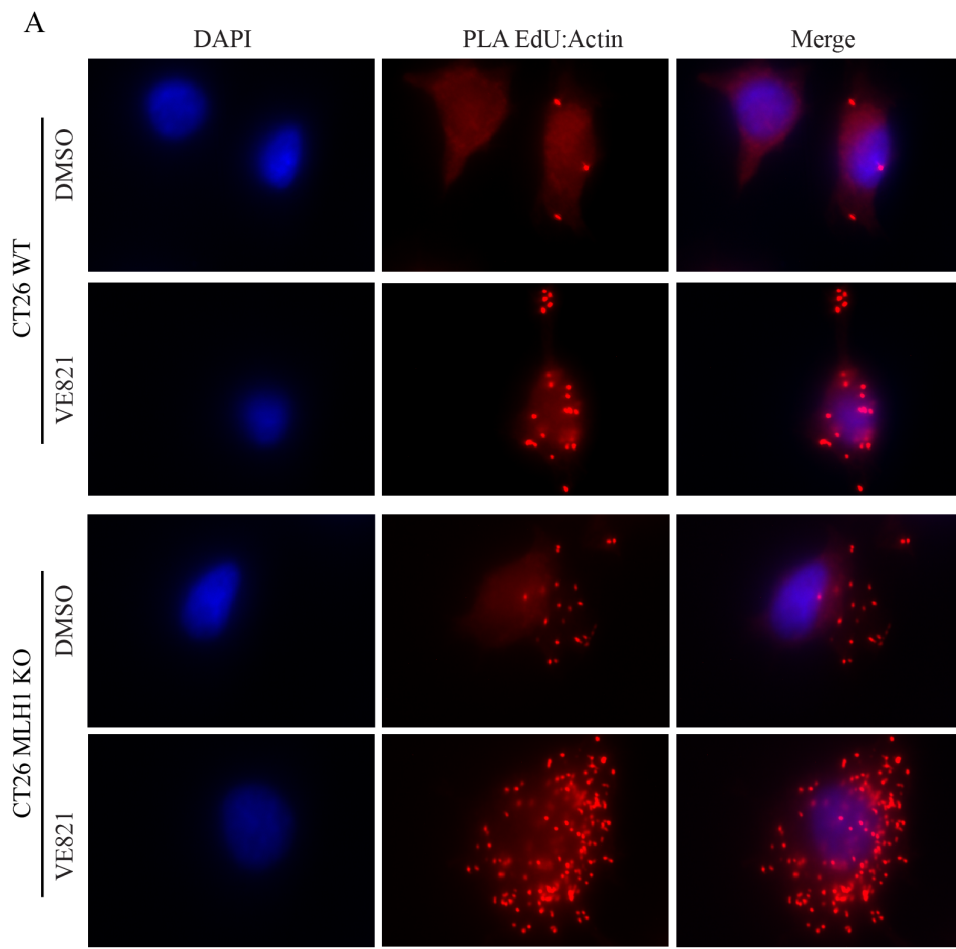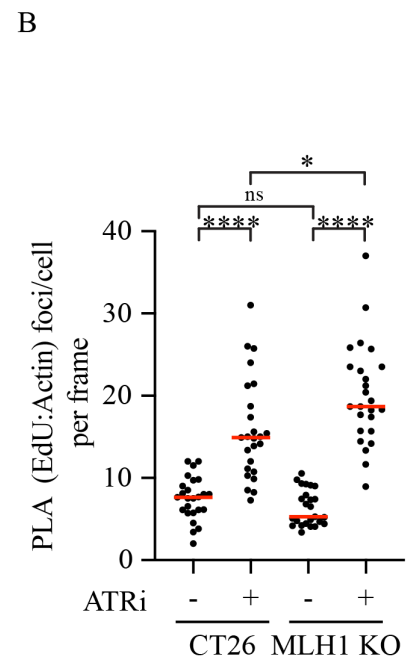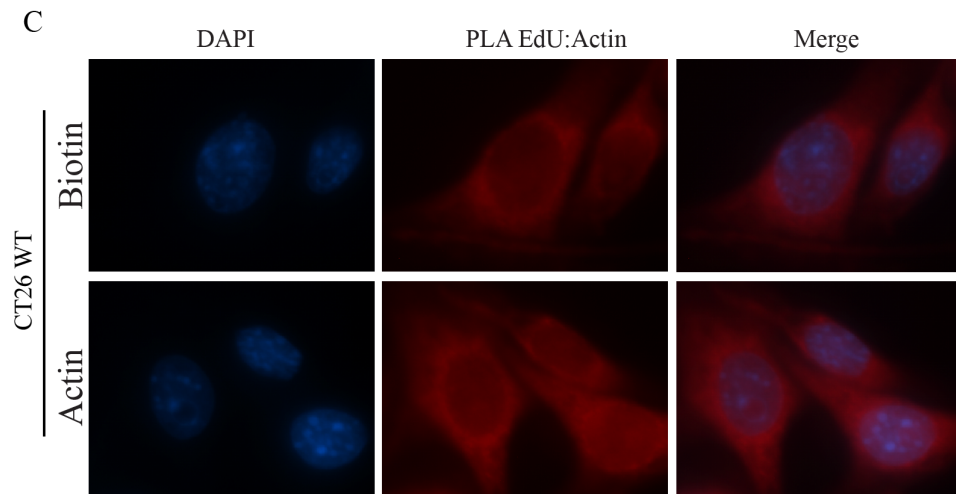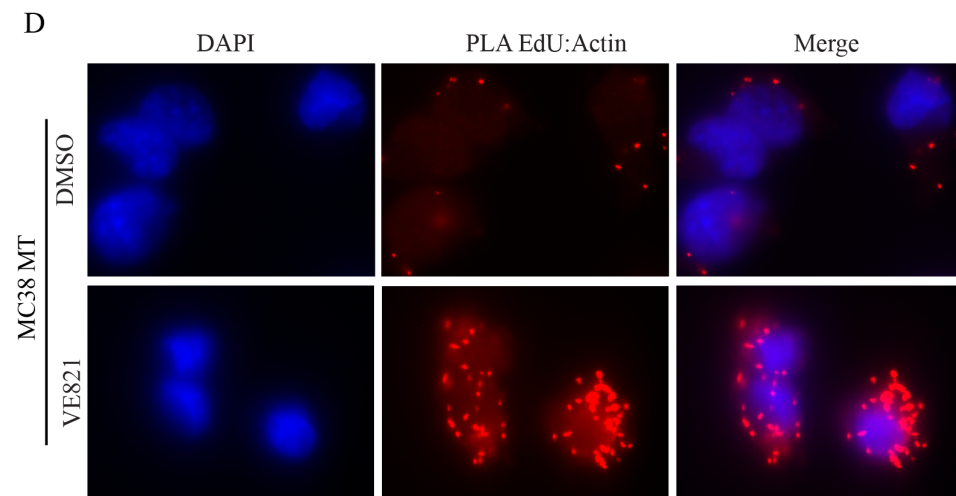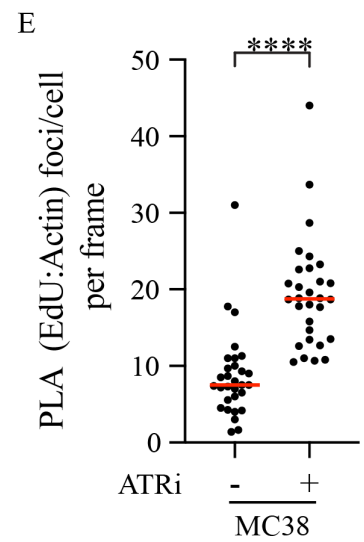

A

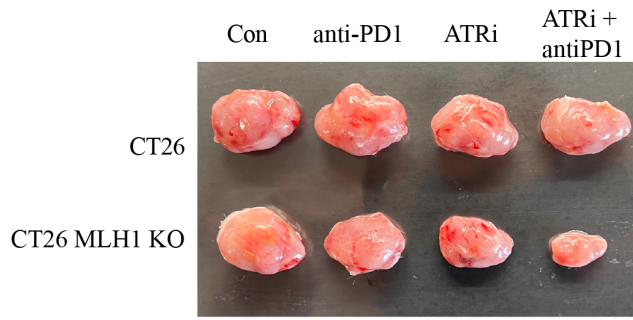

B

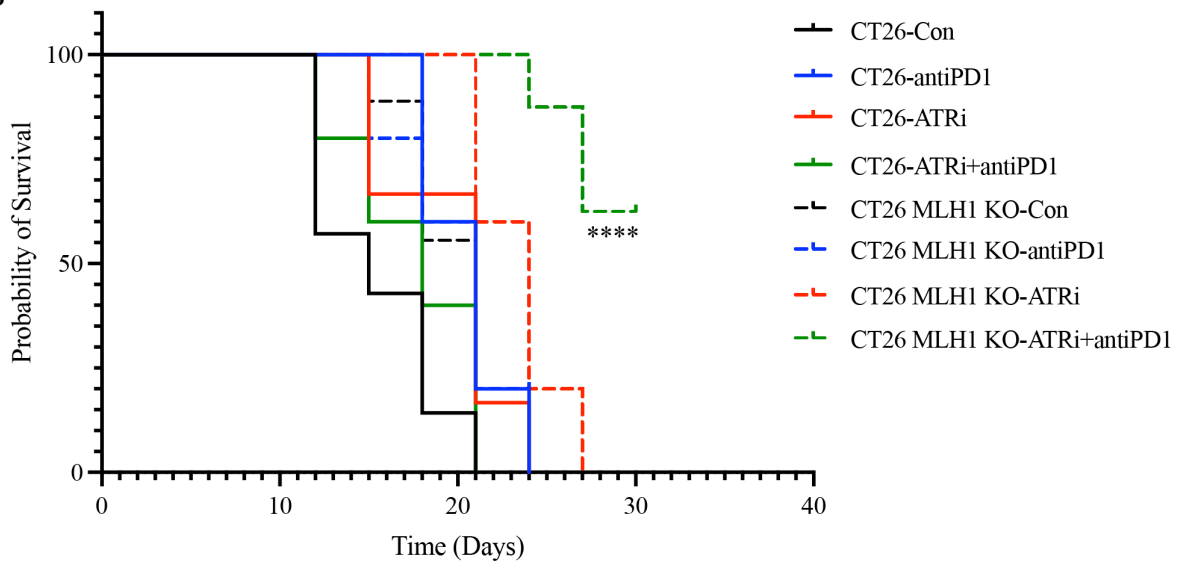

Supplement: Supplemental_Figures.pdf [file Supplemental_Figures.pdf]
